# Supplementary material
Source: Springer Nature journal article supplement (https://www.springermedizin.de/resource/supplementary/12874_2005_147_MOESM3_ESM.pdf/9433866)
Supplement: MOESM3 [file 9433866]

Title and abstracts identified and screened, n = 3635

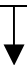

Full copies ordered and received, n=298

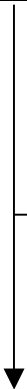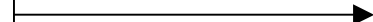

Excluded, n=41  
Prevention of adverse effect, n = 1  
Adverse effect is secondary outcome, n=18  
Methodology paper, n=1  
Treatment of adverse effect, n = 3  
Clinical effectiveness, n=16  
Drop out/ Discontinuation rates, n = 1  
Overdose, n = 1

Publications meeting the inclusion criteria and included in the review, n = 257

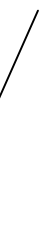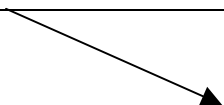

Total number of Cochrane systematic reviews, n = 11

Total number of DARE systematic reviews, n =246
